# Supplementary material for: Decreased expression of the long non-coding RNA SLC7A11-AS1 predicts poor prognosis and promotes tumor growth in gastric cancer
Source: PubMed Central journal article supplement (PMC5762530; doi:10.18632/oncotarget.22486), 2017-11-07
Supplement: oncotarget-08-112530-s001.pdf [file oncotarget-08-112530-s001.pdf]

## Decreased expression of the long non-coding RNA SLC7A11-AS1 predicts poor prognosis and promotes tumor growth in gastric cancer

### SUPPLEMENTARY MATERIALS

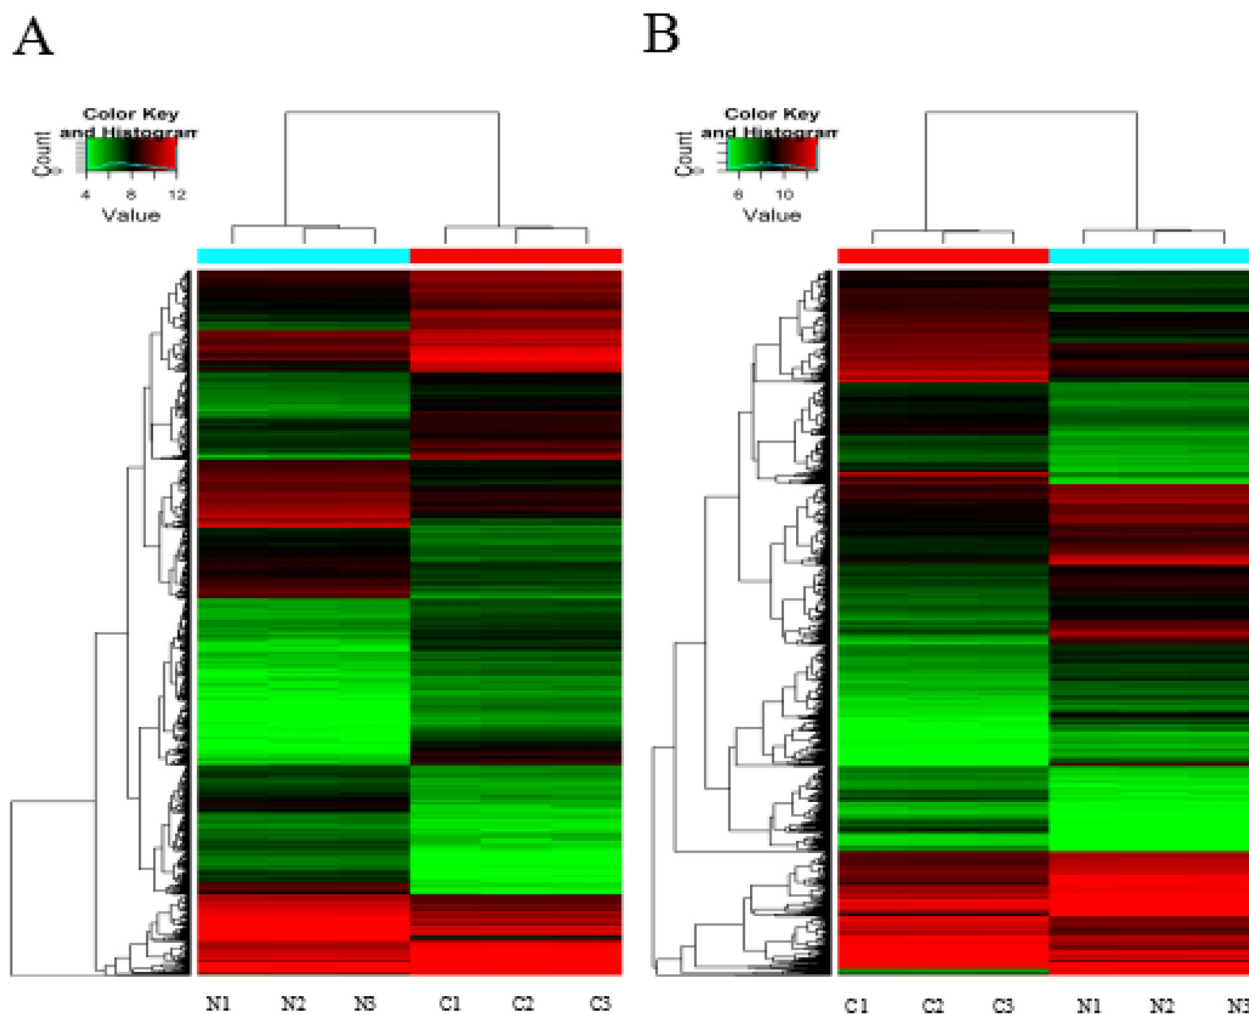

**Supplementary Figure 1: Alterations in lncRNA and mRNA expression profiles between 3 paired gastric cancer tissues and paired adjacent noncancerous tissues.** (A) The result from Hierarchical Clustering heatmap shows distinguishable lncRNA expression profiling among samples. (B) The result from Hierarchical Clustering heatmap shows distinguishable mRNA expression profiling among samples. Gene expression levels are indicated as follows: “Red” indicates high relative expression; and “Green” indicates low relative expression.

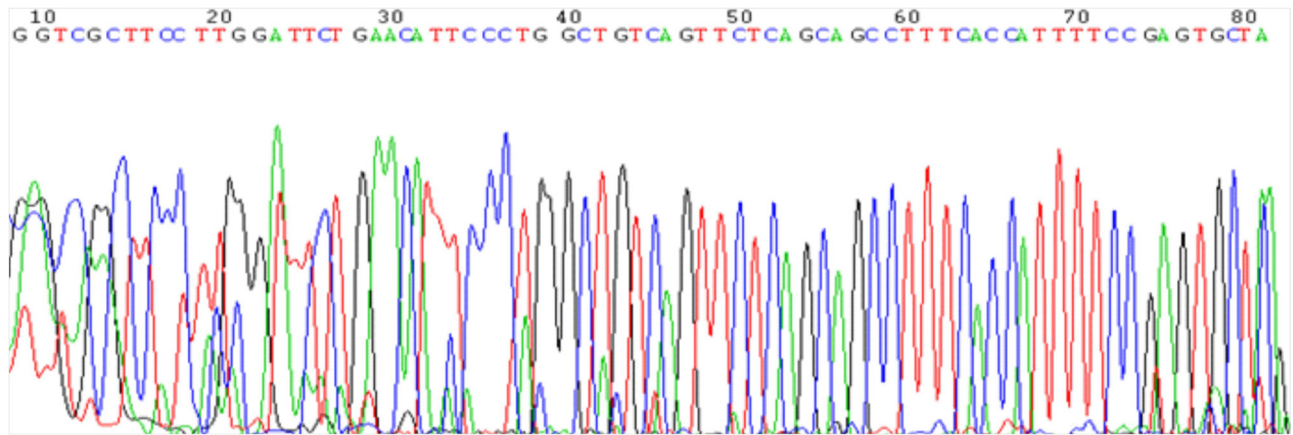

**Supplementary Figure 2: Sequencing result of RT-qPCR product of SLC7A11-AS1.**

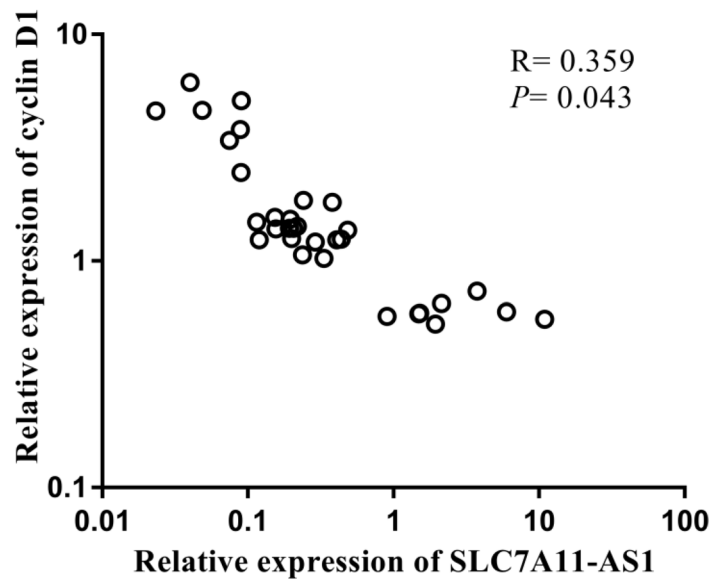

**Supplementary Figure 3: The relationship between SLC7A11-AS1 and cyclin D1 expression level.** Bivariate correlation analysis of the relationship between SLC7A11-AS1 and cyclin D1 expression level, and the resulting Spearman correlation was calculated as 0.359 where  $P = 0.043$  ( $N = 32$ ).

**Supplementary Table 1: The primer sequences used for real-time quantitative PCR**

| Gene name      |         | The primer sequences           | Amplification length (bp) |
|----------------|---------|--------------------------------|---------------------------|
| SLC7A11-AS1    | Forward | 5'-CATCCTGTGGCTGGAGAGAT-3'     | 110 bp                    |
|                | Reverse | 5'-AGCACTCGGAAAATGGTGAA-3'     |                           |
| SLC7A11        | Forward | 5'-ATGCAGTGGCAGTGACCTTT-3'     | 71 bp                     |
|                | Reverse | 5'-GGCAACAAAGATCGGAACTG-3'     |                           |
| ASK1           | Forward | 5'-CCTGAAGCTTAAGTCCCAACC-3'    | 227 bp                    |
|                | Reverse | 5'-GCATCCCTCCCCTTAGTCTC-3'     |                           |
| Cyclin D1      | Forward | 5'-TGGAGGTCTGCGAGGAACA-3'      | 148 bp                    |
|                | Reverse | 5'-TTCATCTTAGAGGCCACGAACAT-3'  |                           |
| Gclm           | Forward | 5'-ACTGACTTAGGAGCATAACTTACC-3' | 111 bp                    |
|                | Reverse | 5'-ACTGACTTAGGAGCATAACTTACC-3' |                           |
| c-jun          | Forward | 5'-ATCGACATGGAGTCCCAG-3'       | 100 bp                    |
|                | Reverse | 5'-ATCGACATGGAGTCCCAG-3'       |                           |
| p38            | Forward | 5'-TTCATGCGAAAAGAACCCTACAG-3'  | 138 bp                    |
|                | Reverse | 5'-TGAGATGGGTCCACCAGATACAC-3'  |                           |
| $\beta$ -actin | Forward | 5'-TCCCTGGAGAAGAGCTACGA-3'     | 194 bp                    |
|                | Reverse | 5'-AGCACTGTGTTGGCGTACAG-3'     |                           |
| GAPDH          | Forward | 5'-GCACCGTCAAGGCTGAGAAC-3'     | 138 bp                    |
|                | Reverse | 5'-TGGTGAAGACGCCAGTGGA-3'      |                           |

**Supplementary Table 2: SLC7A11-AS1 neighboring genes have disturbed expressions in gastric cancer tissues and paired adjacent noncancerous tissues**

| Neighbor genes | Fold change | Official full name            | Type      | Genbank number | <i>P</i> value |
|----------------|-------------|-------------------------------|-----------|----------------|----------------|
| SLC7A11        | 10.6365811  | cystine/glutamate transporter | coding    | NM_014331      | 0.000314299    |
| LINC00616      | 1.199951    | -                             | noncoding | NR_037866      | 0.559868765    |

**Supplementary Table 3: The q-PCR data of relative SLC7A11-AS1 expression level in BGC-823, SGC-7901, MGC-803 and HGC-27 gastric cancer cell lines**

| BGC-823 | SGC-7901* | MGC-803# | HGC-27* |
|---------|-----------|----------|---------|
| 0.838   | 0.963     | 1.194    | 1.511   |
| 0.833   | 1.011     | 1.298    | 1.586   |
| 0.844   | 0.963     | 1.391    | 1.565   |

BGC-823 VS SGC-7901, \* $P = 0.001$ ; BGC-823 VS MGC-803, # $P = 0.0013$ , BGC-823 VS HGC-27, \* $P < 0.001$ .

**Supplementary Table 4: The q-PCR data of relative SLC7A11-AS1 and SLC7A11 expression levels in SGC-7901, MGC-803 and HGC-27 cells infected adenovirus with sh-RNA by sh-NC and sh-SLC7A11-AS1 vector**

| Gene        | SGC-7901 |                |          | MGC-803 |                |          | HGC-27 |                |          |
|-------------|----------|----------------|----------|---------|----------------|----------|--------|----------------|----------|
|             | NC       | Sh-SLC7A11-AS1 | <i>P</i> | NC      | Sh-SLC7A11-AS1 | <i>P</i> | NC     | Sh-SLC7A11-AS1 | <i>P</i> |
| SLC7A11-AS1 | 1.007    | 0.645          |          | 1.049   | 0.883          |          | 0.973  | 0.933          |          |
|             | 0.986    | 0.767          | 0.001    | 1.007   | 0.823          | 0.023    | 1.02   | 0.926          | 0.008    |
|             | 1.006    | 0.663          |          | 0.946   | 0.737          |          | 1.007  | 0.920          |          |
| SLC7A11     | 0.955    | 1.341          |          | 0.920   | 1.283          |          | 0.992  | 1.372          |          |
|             | 1.059    | 1.243          | 0.034    | 0.966   | 1.338          | 0.025    | 0.993  | 1.203          | 0.005    |
|             | 0.989    | 1.112          |          | 1.125   | 1.189          |          | 0.993  | 1.254          |          |

**Supplementary Table 5: The OD value of cell vitality in SGC-7901, MGC-803 and HGC-27 cells infected adenovirus with sh-RNA by sh-NC and sh-SLC7A11-AS1 vector**

| Time (hours)   | SGC-7901 |                | MGC-803 |                | HGC-27  |                |
|----------------|----------|----------------|---------|----------------|---------|----------------|
|                | Sh-NC    | Sh-SLC7A11-AS1 | Sh-NC   | Sh-SLC7A11-AS1 | Sh-NC   | Sh-SLC7A11-AS1 |
| 0 h            | 0.325    | 0.307          | 0.364   | 0.362          | 0.376   | 0.438          |
|                | 0.290    | 0.300          | 0.311   | 0.315          | 0.416   | 0.431          |
|                | 0.279    | 0.277          | 0.339   | 0.337          | 0.370   | 0.380          |
|                | 0.283    | 0.289          | 0.313   | 0.316          | 0.413   | 0.394          |
|                | 0.373    | 0.461          | 1.168   | 1.038          | 0.689   | 0.942          |
| 24 h           | 0.370    | 0.470          | 1.127   | 1.096          | 0.611   | 0.813          |
|                | 0.369    | 0.449          | 1.138   | 1.273          | 0.854   | 0.864          |
|                | 0.364    | 0.459          | 1.065   | 1.235          | 0.869   | 0.815          |
|                | 0.619    | 0.719          | 1.755   | 1.785          | 0.929   | 1.389          |
| 48 h           | 0.577    | 0.725          | 1.884   | 1.992          | 1.402   | 1.572          |
|                | 0.565    | 0.754          | 1.885   | 2.094          | 1.414   | 1.460          |
|                | 0.550    | 0.750          | 1.875   | 2.093          | 1.332   | 1.577          |
|                | 0.680    | 0.914          | 2.506   | 2.508          | 2.047   | 2.562          |
| 72 h           | 0.653    | 0.919          | 2.335   | 2.538          | 2.274   | 2.577          |
|                | 0.651    | 0.874          | 2.419   | 2.575          | 2.041   | 2.434          |
|                | 0.632    | 0.871          | 2.395   | 2.809          | 2.343   | 2.547          |
| <i>P</i> value | < 0.001  |                | 0.046   |                | < 0.001 |                |

**Supplementary Table 6: The data of three phases cell population in SGC-7901, MGC-803 and HGC-27 cells infected adenovirus with sh-RNA by sh-NC and sh-SLC7A11-AS1 vector**

| Phase | SGC-7901 |                |                | MGC-803 |                |                | HGC-27 |                |                |
|-------|----------|----------------|----------------|---------|----------------|----------------|--------|----------------|----------------|
|       | Sh-NC    | Sh-SLC7A11-AS1 | <i>P</i> value | Sh-NC   | Sh-SLC7A11-AS1 | <i>P</i> value | Sh-NC  | Sh-SLC7A11-AS1 | <i>P</i> value |
| G1    | 51.96%   | 36.37%         |                | 61.07%  | 61.96%         |                | 77.29% | 69.66%         |                |
|       | 48.79%   | 19.20%         | 0.029          | 59.42%  | 56.64%         | 0.621          | 77.25% | 67.53%         | 0.002          |
|       | 58.41%   | 37.86%         |                | 61.39%  | 60.55%         |                | 80.15% | 70.4%          |                |
| S     | 28.79%   | 48.67%         |                | 33.26%  | 36.12%         |                | 5.21%  | 10.29%         |                |
|       | 36.87%   | 40.64%         | 0.022          | 33.94%  | 37.96%         | 0.013          | 4.35%  | 10.37%         | 0.123          |
|       | 28.12%   | 44.47%         |                | 32.62%  | 35.74%         |                | 6.76%  | 8.3%           |                |
| G2    | 19.29%   | 40.16%         |                | 5.67%   | 1.92%          |                | 17.5%  | 20.04%         |                |
|       | 14.34%   | 17.67%         | 0.354          | 6.64%   | 1.48%          | 0.292          | 18.4%  | 22.1%          | 0.051          |
|       | 13.46%   | 14.96%         |                | 5.98%   | 7.62%          |                | 13.09% | 21.3%          |                |
